# Supplementary material for: Kaiso depletion attenuates transforming growth factor-β signaling and metastatic activity of triple-negative breast cancer cells
Source: PubMed Central journal article supplement (PMC4815049; doi:10.1038/oncsis.2016.17), 2016-03-21

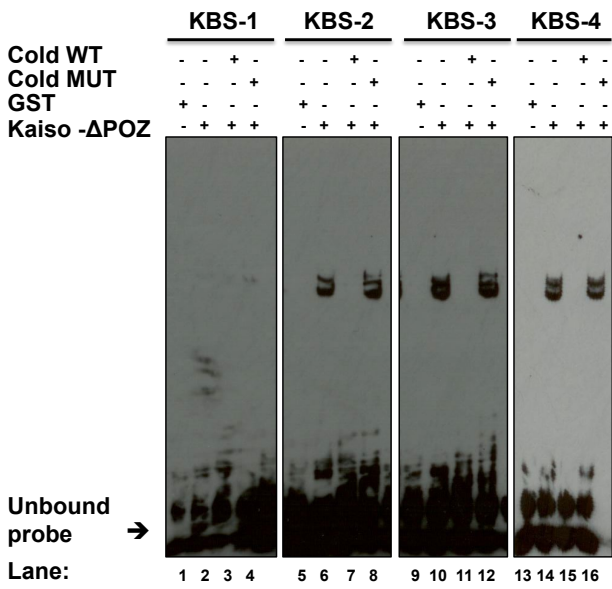

Supplement: oncsis201617x4.pdf [file oncsis201617x4.pdf]
