# Supplementary material for: Kaiso depletion attenuates transforming growth factor-β signaling and metastatic activity of triple-negative breast cancer cells
Source: PubMed Central journal article supplement (PMC4815049; doi:10.1038/oncsis.2016.17), 2016-03-21
Supplement: oncsis201617x7.pdf [file oncsis201617x7.pdf]

## Supplemental Figure Legends

**Supp. Figure 1: *Kaiso depletion attenuates the expression of several EMT-related proteins and induces MET.*** Kaiso was efficiently depleted by a Kaiso-specific shRNA targeting two different regions of the Kaiso mRNA (sh-K-1 and sh-K-2). Kaiso depletion increased expression of E-cadherin in MDA-231, and decreased expression of Vimentin in both MDA-231 and Hs578T cells transfected with either sh-K-1 or sh-K-2 as assessed by RT-PCR and immunoblot analysis.

**Supp. Figure 2: *Kaiso depletion attenuates TGF $\beta$ -induced expression of ZEB1.*** TGF $\beta$ -induced expression of *ZEB1* is attenuated in Kaiso-depleted cells treated with 10ng/mL of TGF $\beta$  for 24 hours. \* =  $p < 0.05$ , \*\* =  $p < 0.005$ .

**Supp. Figure 3: *Kaiso-expression is increased in response to TGF $\beta$  signaling.*** qRT-PCR analysis indicating the expression of Kaiso transcripts at different time points in response to TGF $\beta$  treatment. One-way ANOVA with Newman-Keuls test was used for statistical analysis. \* =  $p < 0.05$ , \*\* =  $p < 0.005$ , \*\*\* =  $p < 0.0001$ .

**Supp. Figure 4: *Kaiso specifically associate with the TGF $\beta$ R2 promoter.*** EMSA analysis showing the specificity of Kaiso binding to the TGF $\beta$ R2 promoter. Unlabeled cold mutated (MUT) probes is incapable of competing with labeled wildtype (WT) probes (lanes 8, 12, 16) compared with unlabeled cold WT probes which competes for

Kaiso binding (lanes 7, 11, 15). m – methylated. Representative images shown. All experiments were conducted in triplicate.

**Supp. Figure 5: *Kaiso specifically interacts with the TGF $\beta$ R1 and TGF $\beta$ R2 promoter in vivo.*** ChIP experiments of MDA-231 and Hs578T chromatin showing that Kaiso does not bind a region upstream of the TGF $\beta$ R1 and TGF $\beta$ R2 promoter *in vivo* lacking the presence of CpGs or Kaiso binding sequences. NTC – no template control. H3 – Histone3 positive control. Input – 10% input.

**Supp. Figure 6: *High TGF $\beta$ R1 expression does not correlate with poor prognosis in breast cancer patients.*** Kaplan-Meier survival curves showing that high TGF $\beta$ R1 expression does not correlate significantly with overall survival in the TCGA breast cancer dataset
